# Supplementary material
Source: HighWire-hosted journal article supplement (https://www.qdcxjkg.com/highwire/filestream/114411/field_highwire_adjunct_files/0/ERJ-01387-2012_Disclosures.pdf)
Supplement: ERJ-01387-2012_Disclosures.pdf [file ERJ-01387-2012_Disclosures.pdf]

**F.A. Post** has received consultation and/or lecture fees and/or support for conference attendance from Abbott, Bristol-Myers Squibb (BMS), Gilead, Merck Sharp and Dohme, Tibotec/Janssen and ViiV/GSK, and his department has received research grants from Bristol-Myers Squibb, Gilead and ViiV/GSK.

**A. Mocroft** has received funds for consultancies, education, guest speaker fees or honoraria from BMS, Boehringer Ingelheim, Merck, Pfizer and Gilead.
